# Supplementary material for: A new protocol for absolute quantification of haemosporidian parasites in raptors and comparison with current assays
Source: PubMed Central journal article supplement (PMC7368712; doi:10.1186/s13071-020-04195-y), 2020-07-17

a

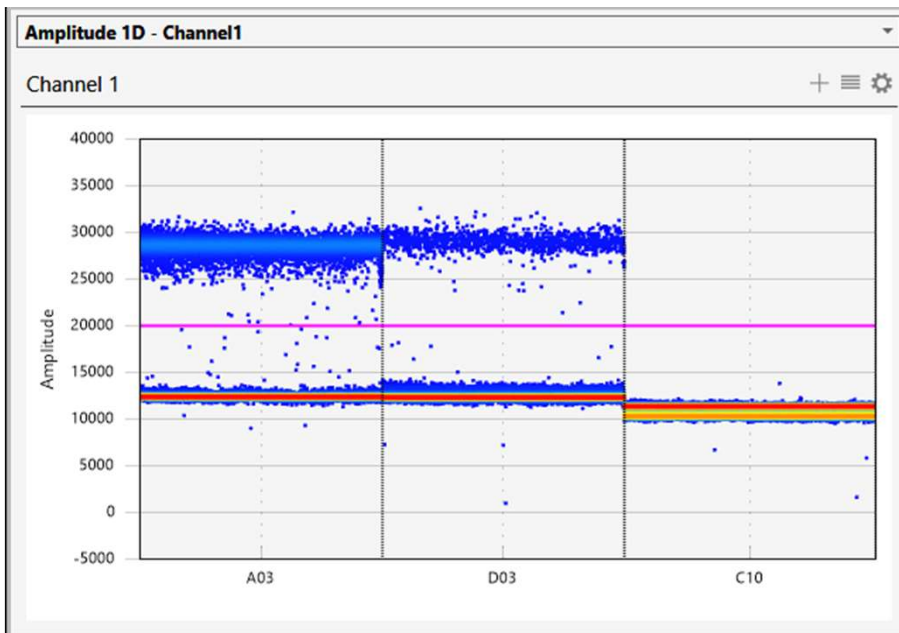

b

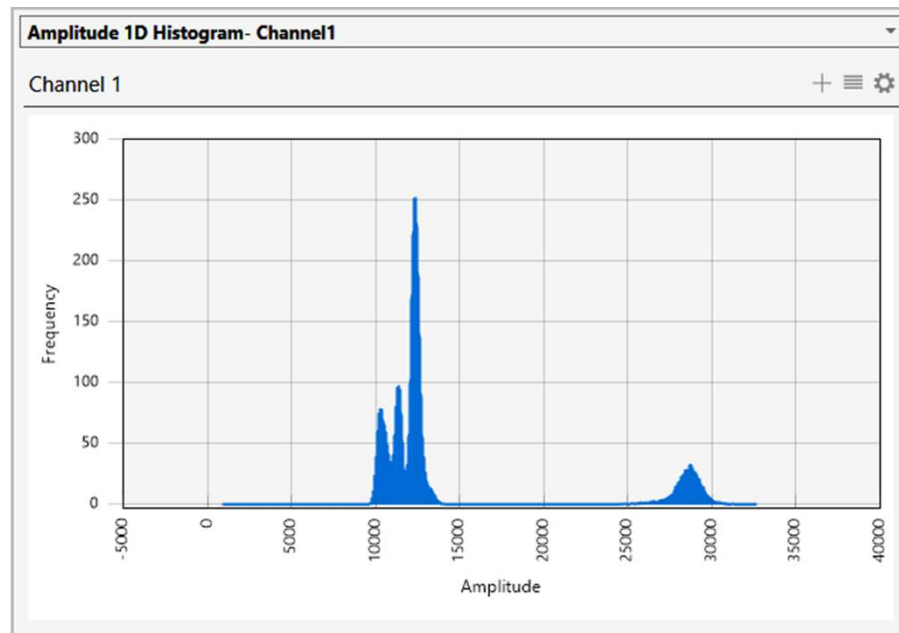

c

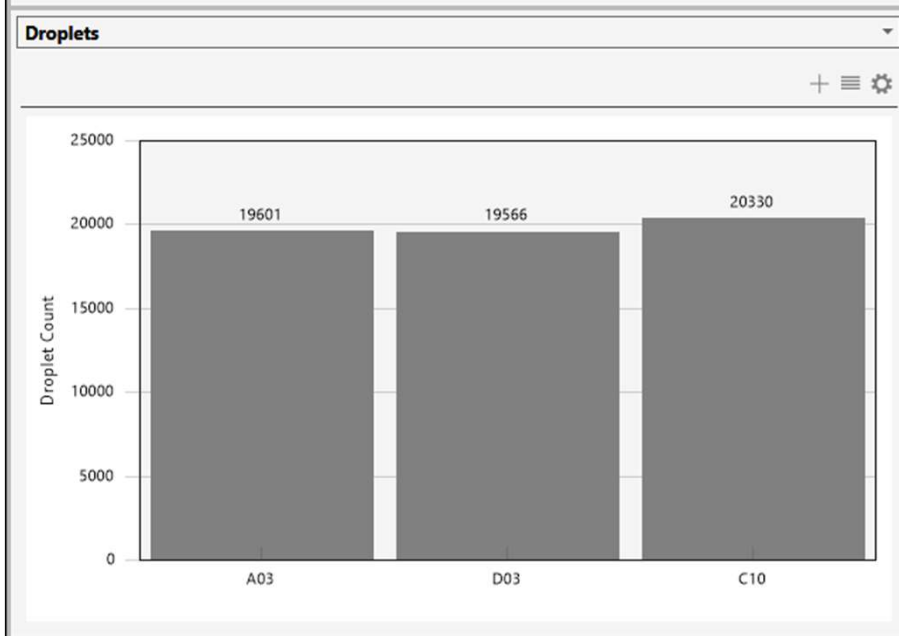

d

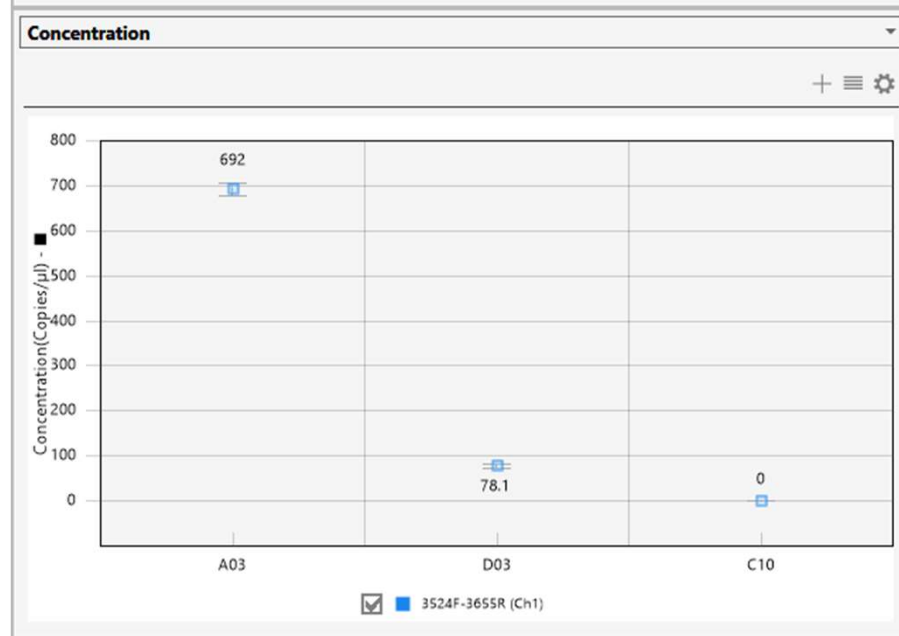

Supplement: 13071_2020_4195_MOESM3_ESM.pdf [file 13071_2020_4195_MOESM3_ESM.pdf]
